# Supplementary material for: Non-covalent modification of reduced graphene oxide by a chiral liquid crystalline surfactant
Source: Royal Society of Chemistry journal article supplement (doi:10.1039/c5nr07620j), 2015-12-28
Supplement: c5nr07620j1.pdf [file c5nr07620j1.pdf]

## Electronic Supplementary Information

### Non-covalent Modification of Reduced Graphene Oxide by Chiral Liquid Crystalline Surfactant

Pengcheng Lin, Yuehua Cong\*, Cong Sun and Baoyan Zhang\*

Centre for Molecular Science and Engineering, Northeastern University, Shenyang, 110819, China

#### Synthesis of CLCS

Monomer1 ( $M_1$ ) cholesteryl 4-(allyloxy)benzoate was synthesized according to reference<sup>1</sup>, it showed the following phase transition: Crystalline (112°C), chiral nematic (240°C), and isotropic fluid, the detailed chemical parameters of  $M_1$  were as follows, IR (KBr): 3056(=CH), 2973-2857(CH<sub>3</sub>, CH<sub>2</sub>), 1704(C=O), 1643 (C=C), 1605(Ar), 1494(Ar), 1273(C-O-C), 1171(C-O-C), <sup>1</sup>HNMR (600 MHz, CDCl<sub>3</sub>,  $\delta$ ): 7.99-7.98(d, 2H, Ar-H), 6.92(d, 2H, Ar-H), 6.05(m, 1H, CH<sub>2</sub>=CH-), 5.44-5.41(t, 2H, CH<sub>2</sub>=CH-), 5.32-5.31(m, 1H, =CH- in cholesteryl), 4.59-4.58(d, 2H, -OCH<sub>2</sub>-), 2.03-0.67(m, 44H, cholesteryl-H). Monomer2 ( $M_2$ ) 10-(4'-(4-(allyloxy)benzoyloxy)biphenyl-4-yl oxy)-10-oxodecanoic acid was synthesized according to reference<sup>2</sup>, it showed the following phase transition: Crystalline (135.2°C), nematic (199.6°C), and isotropic fluid, the detailed chemical parameters of  $M_2$  were as follows, IR (KBr): 3029, 2930, 2853(-CH<sub>2</sub>-), 2690-2510(-OH in -COOH), 1760-1700 (C=O in ester and carboxylic acid modes), 1605, 1504, 1269(C-O-C), <sup>1</sup>HNMR (600 MHz, CDCl<sub>3</sub>,  $\delta$ ): 1.23-1.35(m, 10H, (CH<sub>2</sub>)<sub>5</sub>), 1.69(m, 2H, -CH<sub>2</sub>CH<sub>2</sub>COOH), 2.11(m, 2H, -COCH<sub>2</sub>), 3.06(m, 2H, -CH<sub>2</sub>CH<sub>2</sub>COOH), 5.01(d, 2H, -OCH<sub>2</sub>-), 5.70-5.82 (t, 2H, CH<sub>2</sub>=CH-), 6.11(m, 1H, CH<sub>2</sub>=CH-), 6.81-7.17(m, 4H, -Ar), 7.47-7.64(m, 8H, -2Ar). Nonmesogens monomer 3 ( $M_3$ ) N-(1, 1-bis(1-ethyl-2-methyl-1H-indol-3-yl)-3-oxo-1,3-dihydroisobenzofuran-5-yl)undec-10-enamide was synthesized according to references,<sup>3,4</sup> it showed the following phase sequence: Crystalline (68.6 °C), and isotropic fluid, the detailed chemical parameters of  $M_3$  were as follows, IR (KBr): 3317 (NH), 3048 (=CH), 2974-2853 (CH<sub>3</sub>, CH<sub>2</sub>), 1761, 1735 (C=O), 1610 (Ar), 1493 (Ar), <sup>1</sup>H NMR (600 MHz, CDCl<sub>3</sub>,  $\delta$ ): 1.281 (m, 10H,(CH<sub>2</sub>)<sub>5</sub>), 1.301 (t, 6H, 2NCH<sub>2</sub>CH<sub>3</sub>), 1.718 (m, 2H, -COCH<sub>2</sub>CH<sub>2</sub>), 2.036 (s, 6H, 2NCCH<sub>3</sub>), 2.264 (m, 2H, =CHCH<sub>2</sub>), 2.413 (t, 2H,-COCH<sub>2</sub>), 4.189 (q, 4H, 2NCH<sub>2</sub>), 4.925 (d, 2H, =CH<sub>2</sub>), 5.778 (m, 1, =CH), 6.735 (d, 2H, 2Ar-), 6.816 (d, 2H, 2Ar-),

7.095 (q, 2H, 2Ar-), 7.304 (q, 2H, 2Ar-), 7.320 (d, 1H, Ar-), 7.551 (d, 1H, Ar-), 8.065 (s, 1H, NH-), 8.346 (s, 1H, Ar-). CLCS was synthesized according to reference<sup>5</sup>. M<sub>1</sub>, M<sub>2</sub> and M<sub>3</sub> were added to polymethylhydrogensiloxane (PMHS, Aldrich). After the addition of platinum catalyst, the polymerization was carried out at 80 °C under nitrogen protection with magnetic stirring until the infrared spectra showed no Si-H absorption peak at 2166cm<sup>-1</sup>.<sup>6</sup>

### **Optical textures of CNLCs**

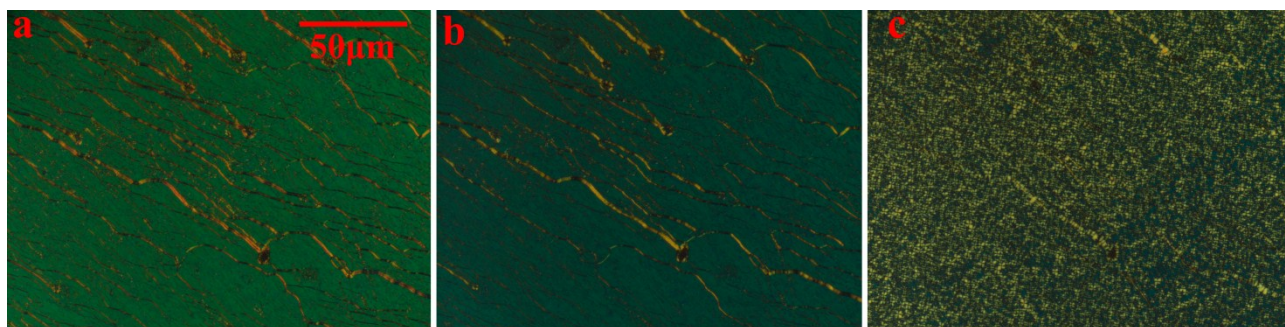

Fig. S1 Optical textures of CNLCs, a (20 °C), b(40 °C) and c (60 °C), crossed polarizers, 200×.

### **RGB values, tristimulus values, and chromaticity coordinates of CLCS, CLCS+0.3wt%RGO, CLCS+0.6wt%RGO and CLCS+0.9wt%RGO at different temperatures**

Table S1. RGB values, tristimulus values, and chromaticity coordinates of CLCS at different temperatures.

| Temperature | R   | G   | B   | X       | Y       | Z      | x     | y     |
|-------------|-----|-----|-----|---------|---------|--------|-------|-------|
| 148 °C      | 243 | 126 | 59  | 960.24  | 824.97  | 337.18 | 0.452 | 0.389 |
| 165 °C      | 255 | 198 | 82  | 1145.58 | 1168.89 | 469.92 | 0.411 | 0.42  |
| 167 °C      | 115 | 201 | 4   | 675.04  | 1037.97 | 33.73  | 0.386 | 0.594 |
| 170 °C      | 0   | 76  | 102 | 248.41  | 355.02  | 574.91 | 0.211 | 0.301 |
| 174 °C      | 50  | 46  | 63  | 290.23  | 264.96  | 355.04 | 0.319 | 0.291 |

Table S2. RGB values, tristimulus values, and chromaticity coordinates of CLCS+0.3wt%RGO at different temperatures.

| Temperature | R   | G   | B   | X       | Y       | Z      | x     | y     |
|-------------|-----|-----|-----|---------|---------|--------|-------|-------|
| 148 °C      | 243 | 124 | 58  | 955.61  | 815.73  | 331.48 | 0.454 | 0.388 |
| 161 °C      | 255 | 199 | 52  | 1113.43 | 1171.68 | 302.15 | 0.43  | 0.453 |
| 164 °C      | 105 | 190 | 0   | 623.56  | 977.23  | 10.74  | 0.387 | 0.606 |
| 166 °C      | 0   | 65  | 113 | 241.57  | 305.19  | 635.83 | 0.204 | 0.258 |
| 172 °C      | 58  | 49  | 76  | 332.32  | 287.51  | 427.94 | 0.317 | 0.274 |

Table S3. RGB values, tristimulus values, and chromaticity coordinates of CLCS+0.6wt%RGO at different temperatures.

| Temperature | R   | G   | B   | X       | Y       | Z      | x     | y     |
|-------------|-----|-----|-----|---------|---------|--------|-------|-------|
| 148 °C      | 255 | 135 | 70  | 1021.66 | 878.95  | 399.23 | 0.444 | 0.382 |
| 158 °C      | 255 | 221 | 0   | 1093.20 | 1269.55 | 12.49  | 0.46  | 0.534 |
| 160 °C      | 0   | 119 | 3   | 211.84  | 546.47  | 23.51  | 0.271 | 0.699 |
| 162 °C      | 0   | 63  | 142 | 270.85  | 297.75  | 797.95 | 0.198 | 0.218 |
| 167 °C      | 78  | 71  | 125 | 481.62  | 411.45  | 703.3  | 0.302 | 0.258 |

Table S4. RGB values, tristimulus values, and chromaticity coordinates of CLCS+0.9wt%RGO at different temperatures.

| Temperature | R   | G   | B   | X       | Y       | Z      | x     | y     |
|-------------|-----|-----|-----|---------|---------|--------|-------|-------|
| 148 °C      | 249 | 135 | 47  | 979.06  | 871.57  | 270.56 | 0.461 | 0.411 |
| 154 °C      | 255 | 242 | 1   | 1131.11 | 1366.01 | 19.27  | 0.449 | 0.543 |
| 155 °C      | 0   | 129 | 0   | 225.97  | 592.2   | 7.29   | 0.274 | 0.718 |
| 157 °C      | 0   | 55  | 109 | 219.54  | 259.04  | 612.89 | 0.201 | 0.237 |
| 161 °C      | 42  | 42  | 89  | 290.45  | 240.16  | 500.27 | 0.282 | 0.233 |

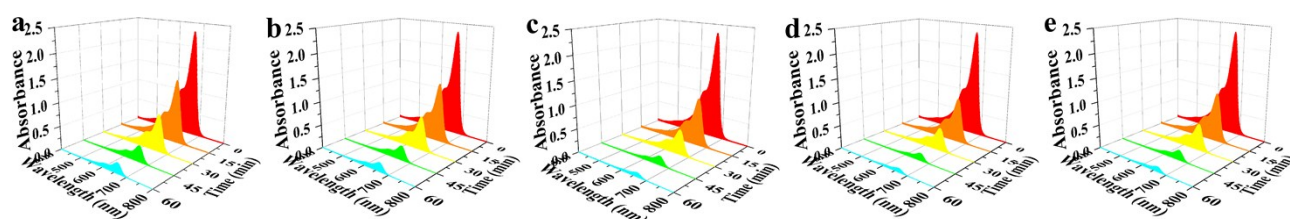

Fig. S2 UV-Vis absorption spectra of MB solutions at different time intervals for different amounts of RGO at the fixed amount of ZnO/CLCS, (a) 0.02 g ZnO+2 mg CLCS, (b) 0.02 g ZnO+2 mg CLCS+0.1 mg RGO, (c) 0.02 g ZnO+2 mg CLCS+0.2 mg RGO, (d) 0.02 g ZnO+2 mg CLCS+0.4 mg RGO and (e) 0.02 g ZnO+2 mg CLCS+0.6 mg RGO.

## REFERENCES

- [1] F. B. Meng, B. Y. Zhang, L. M. Liu, B. L. Zang, *Polymer*, 2003, **44**, 3935-3943.
- [2] F. B. Meng, B. Y. Zhang, Y. G. Jia, D. S. Yao, *Liq cryst*, 2005, **32**, 183-189.
- [3] *US pat.*, 3624107, 1971.
- [4] Y. Wang, Ph. D thesis, Northeastern University, 2005.
- [5] B. Y. Zhang, F. B. Meng, Y. H. Cong, *Opt Express*, 2007, **15**, 10175-10181.
- [6] S. X. Lu, M. M. Melo, J. Q. Zhao, E. M. Pearce, T. K. Kwei, *Macromolecules*, 1995, **28**, 4908-4913.
